# Supplementary material
Source: Springer Nature journal article supplement (https://www.springermedizin.de/resource/supplementary/12943_2004_80_MOESM10_ESM.pdf/9553390)

6F

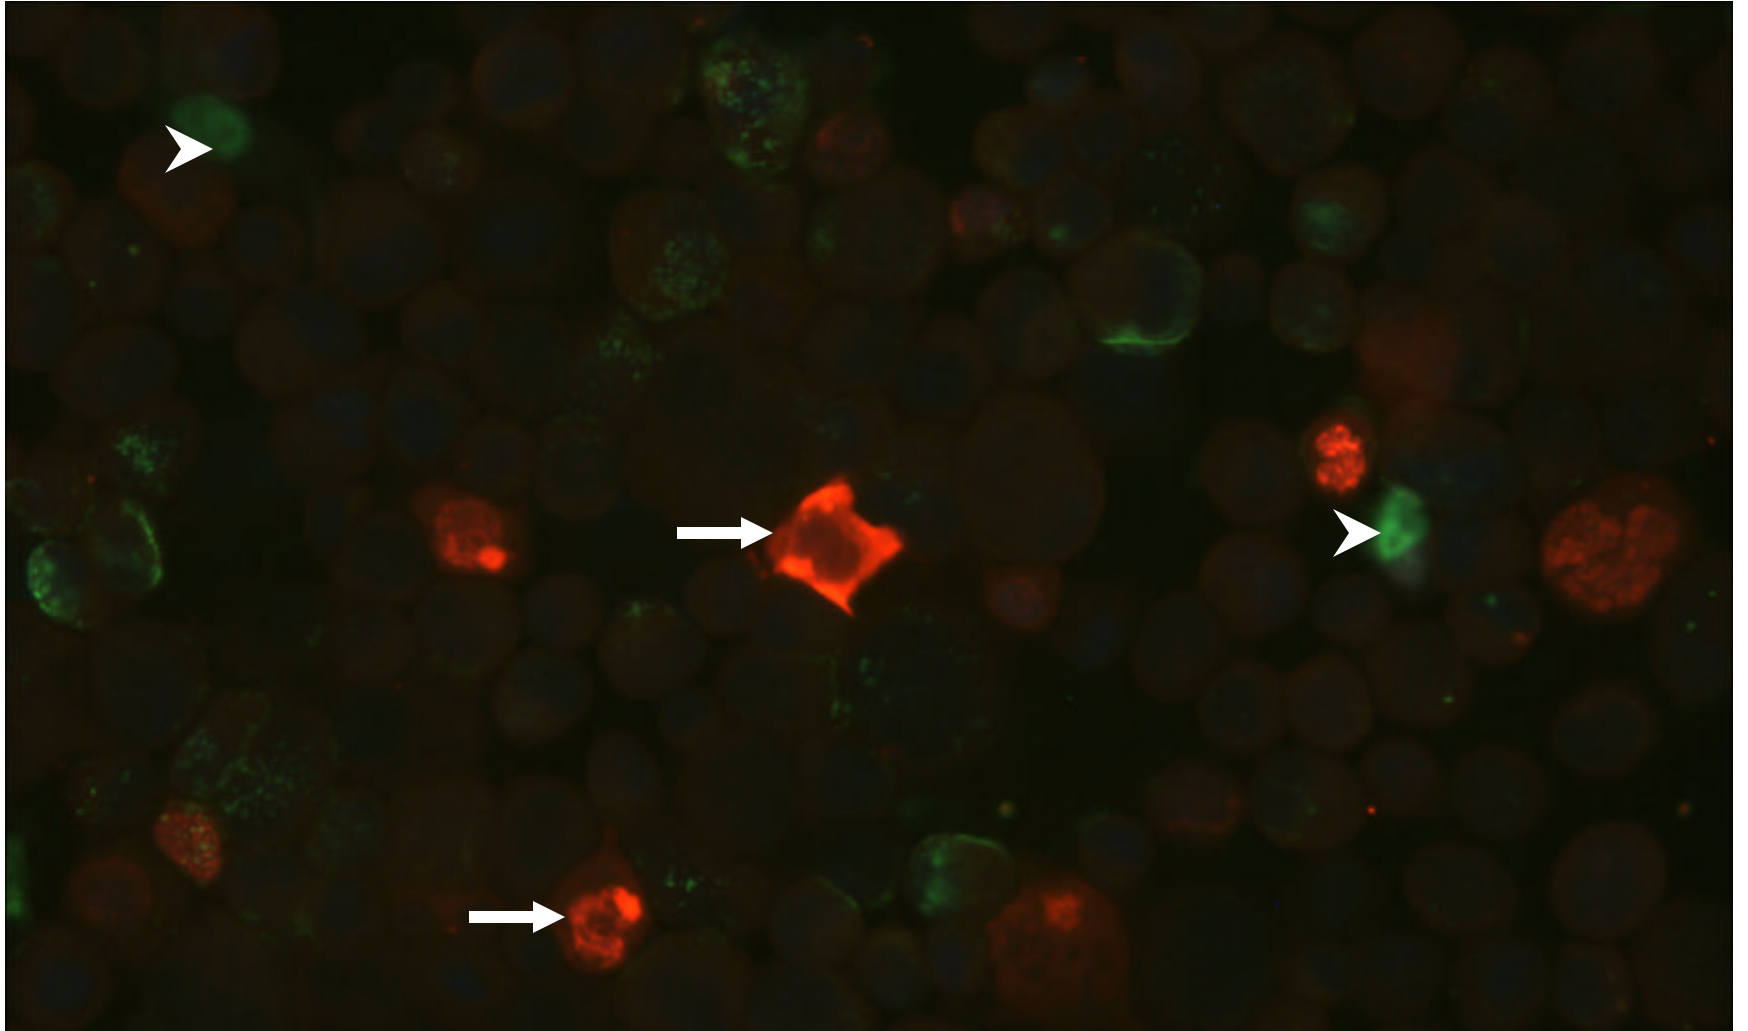

Fig. 6

Supplement: MOESM10 [file 9553390]
